# Supplementary material
Source: Springer Nature journal article supplement (https://www.springermedizin.de/resource/supplementary/12887_2013_962_MOESM1_ESM.pdf/9476700)
Supplement: MOESM1 [file 9476700]

## Suikerplein voor ouders

Welkom op Suikerplein, de digitale behandelomgeving van uw diabetescentrum. Suikerplein is ontwikkeld door de Radboud Universiteit Nijmegen (Medisch Centrum). Contact tussen ouders en diabetesteam staat op Suikerplein centraal. Een ander belangrijk onderdeel is het contact tussen ouders onderling. Dit contact heeft in eerste instantie plaats met uw eigen behandelaars en ouders die binnen uw eigen centrum behandeld worden.

Gebruikersnaam

Wachtwoord

Log mij nu in

[Wachtwoord vergeten?](#)

### Deelnemende centra

**Albert  
Schweitzer**  
ziekenhuis

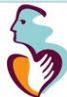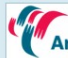

**Amphia Ziekenhuis**

**mcl**

medisch centrum  
leeuwarden

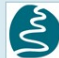

**Meander**  
MEDISCH CENTRUM

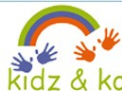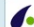

**HagaZiekenhuis van Den Haag**

**kdcn**

KINDER DIABETES CENTRUM NIJMEGEN
